# Supplementary material for: Site-Specific Phosphorylation of VEGFR2 Is Mediated by Receptor Trafficking: Insights from a Computational Model
Source: PubMed Central journal article supplement (PMC4466579; doi:10.1371/journal.pcbi.1004158), 2015-06-12
Supplement: pcbi.1004158.s002.pdf [file pcbi.1004158.s002.pdf]

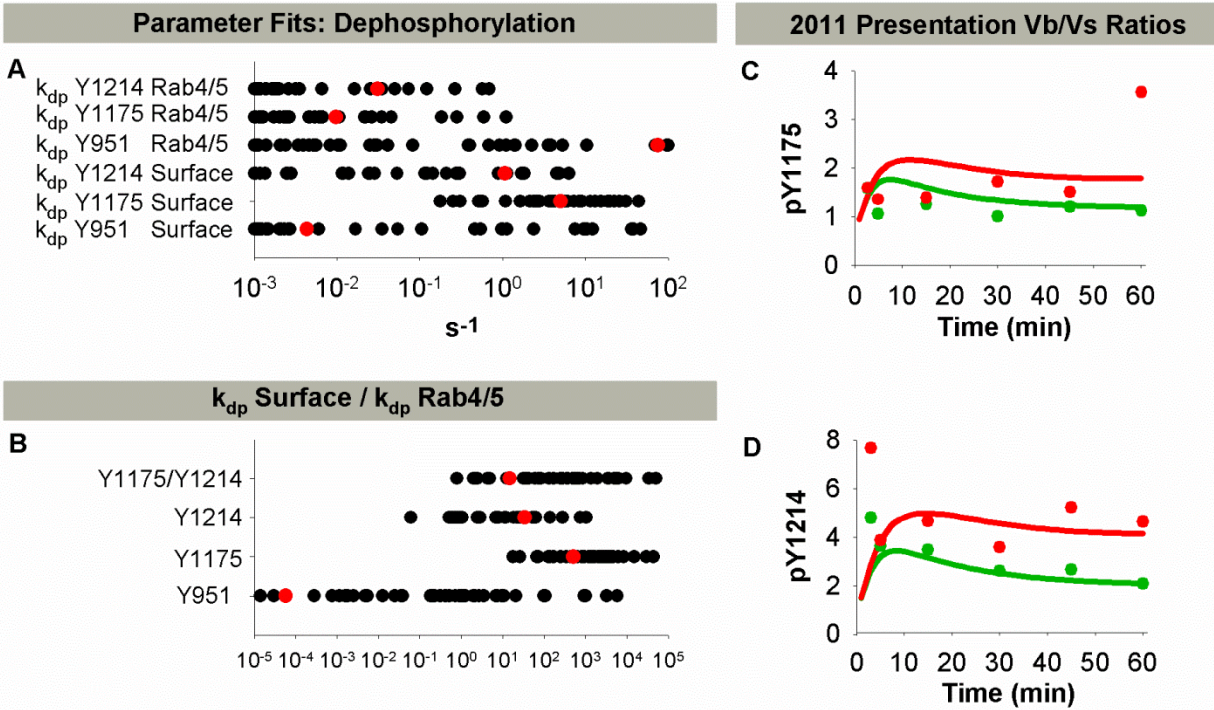

**Figure S2. Distribution of Phosphorylation Parameters.** These panels expand on the results shown in Figure 3 of the main manuscript. **A.** Dephosphorylation parameters fit to experimental data. 47 sets of parameters were accepted as achieving good fit. Red dots indicate a representative coherent set of parameters used throughout the rest of this study. *See Methods.* **B.** Ratios of surface-to-internal dephosphorylation rates (panel A) for Y951, Y1175, and Y1214. The ratio of these ratios for Y1175 and Y1214 is also shown. The surface-to-internal dephosphorylation ratio is consistently higher for Y1175 than for Y1214. **C-D.** Ratios of immobilized VEGF (Vb) / soluble VEGF (Vs) for pY1175 (C) and pY1214 (D) from the 2011 presentation study [8]. Green, electrostatically immobilized VEGF; red, covalently immobilized VEGF. Lines, simulation; dots, experimental data. These ratios, along with the data in Fig. 3B-C, H were used to fit the dephosphorylation parameters.
