# Supplementary material for: Site-Specific Phosphorylation of VEGFR2 Is Mediated by Receptor Trafficking: Insights from a Computational Model
Source: PubMed Central journal article supplement (PMC4466579; doi:10.1371/journal.pcbi.1004158), 2015-06-12
Supplement: pcbi.1004158.s006.pdf [file pcbi.1004158.s006.pdf]

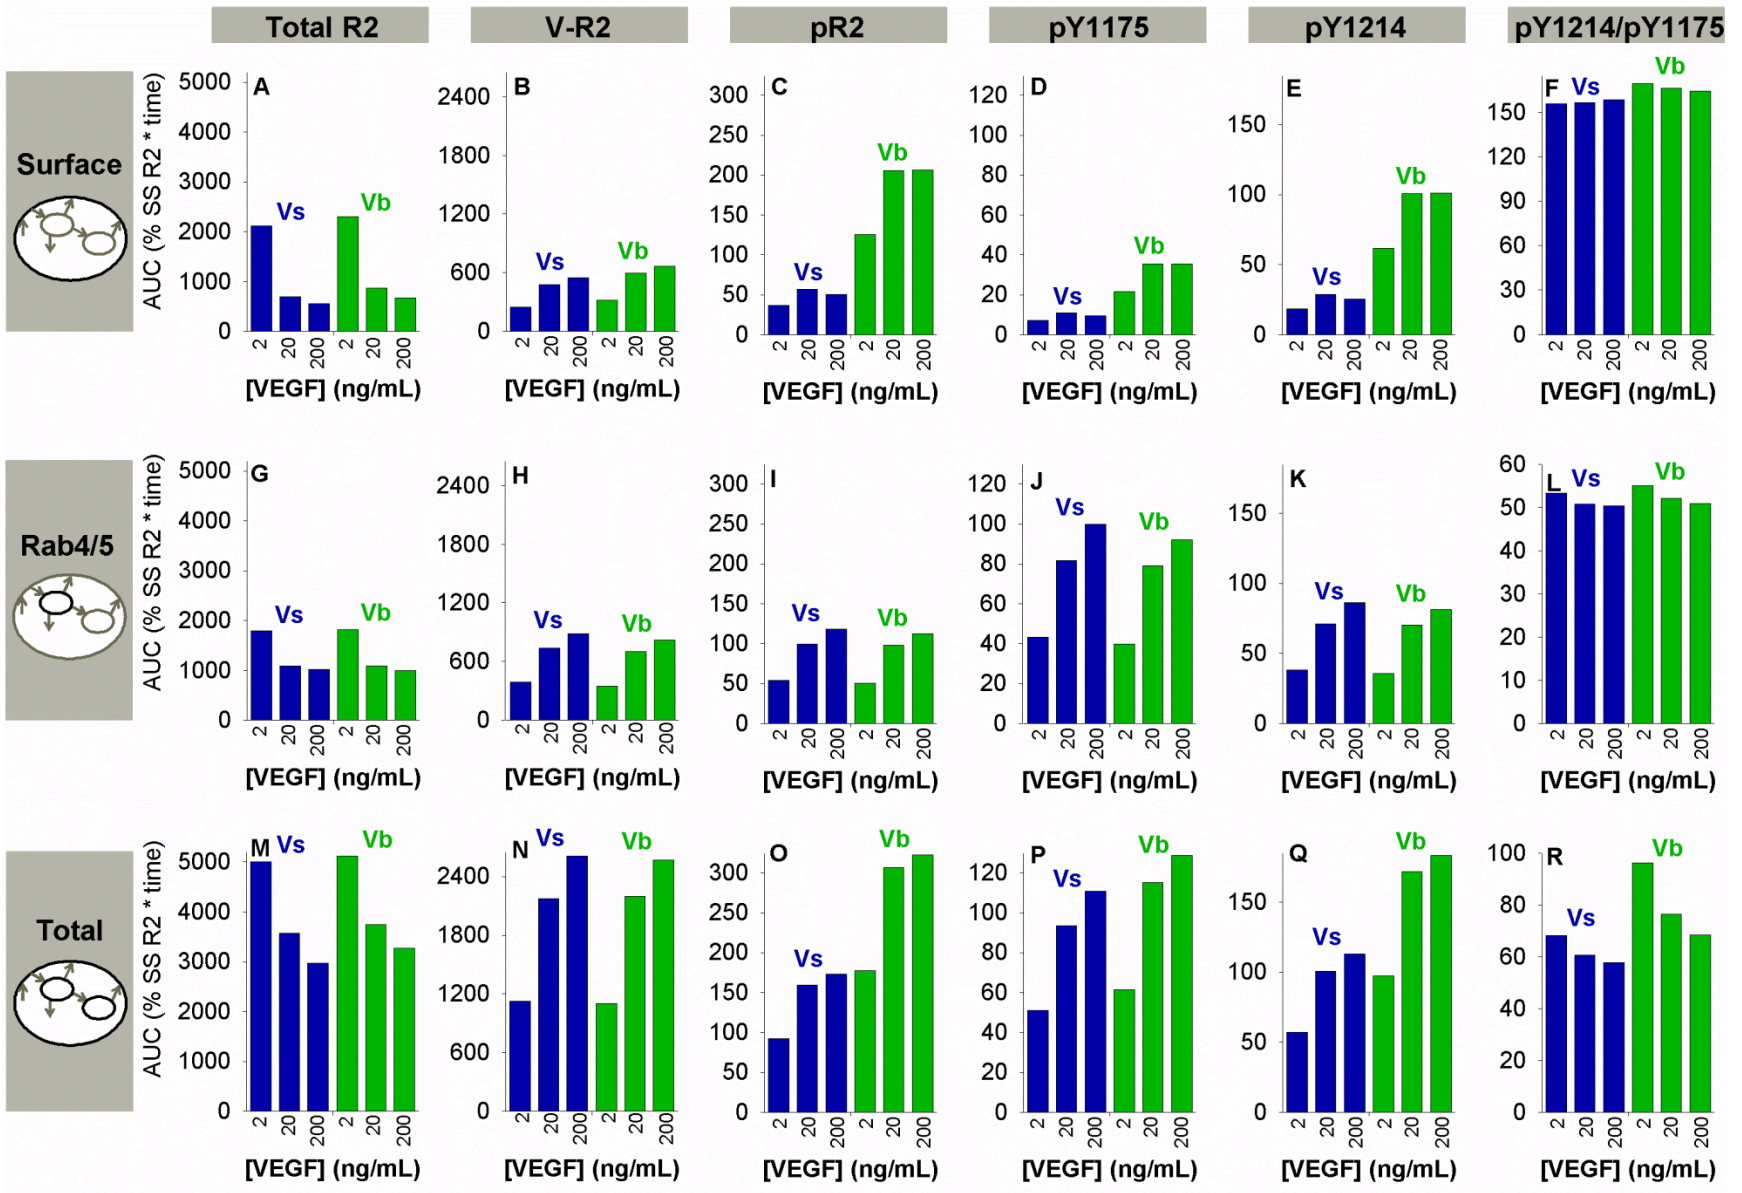

**Figure S6. Trends in ligated and phosphorylated VEGFR2 are consistent across VEGF concentrations.** These panels expand on the results shown in Figure 6 of the main manuscript. All panels show area under the curve (AUC), for the first 60 minutes after stimulation with soluble (Vs, blue) or immobilized (Vb, green) VEGF at concentrations of 2, 20, or 200 ng/mL. AUCs are shown for cell surface quantities (A-F), Rab4/5 quantities (G-L), and total quantities (M-R). AUCs are shown for total VEGFR2 (1<sup>st</sup> column), ligated VEGFR2 (2<sup>nd</sup> column), VEGFR2 phosphorylation on any considered tyrosine residue (pR2, 3<sup>rd</sup> column), pY1175 (4<sup>th</sup> column), and pY1214 (5<sup>th</sup> column). The last column shows the AUC for the curve pY1214/pY1175 (not the ratio AUC for pY1175 / AUC for pY1214) for surface VEGFR2 (F), Rab4/5 VEGFR2 (L), and total VEGFR2 (R).
