# Supplementary material for: Site-Specific Phosphorylation of VEGFR2 Is Mediated by Receptor Trafficking: Insights from a Computational Model
Source: PubMed Central journal article supplement (PMC4466579; doi:10.1371/journal.pcbi.1004158), 2015-06-12
Supplement: pcbi.1004158.s009.pdf [file pcbi.1004158.s009.pdf]

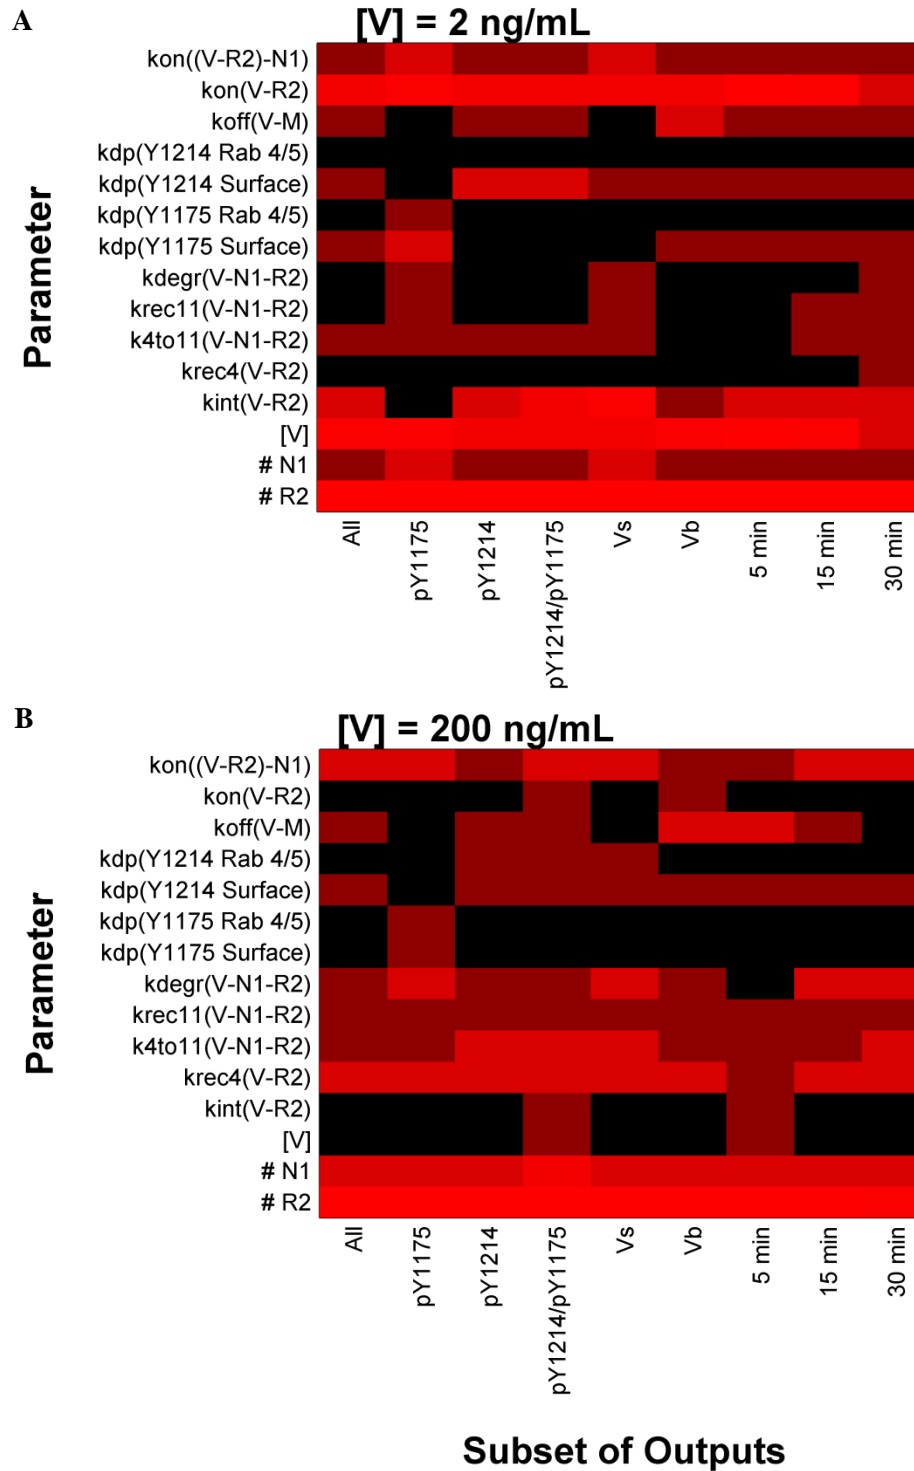

**Figure S9. Sensitivity of model outputs varies with VEGF concentration.** Sensitivity of outputs to small changes in parameters and initial conditions. Values are average fold change in selected outputs for a 1-fold change in the specified parameter. **A.** [V] = 2 ng/mL. Scale: Black = 0, Bright red (maximum) = 0.77 **B.** [V] = 200 ng/mL. Scale: Black = 0, Bright red = 1.03 (maximum).
