# Supplementary material for: Site-Specific Phosphorylation of VEGFR2 Is Mediated by Receptor Trafficking: Insights from a Computational Model
Source: PLOS journal article supplement (doi:10.1371/journal.pcbi.1004158), 2015-06-12
Supplement: S7 (10.1371/journal.pcbi.1004158.s007) [file journal.pcbi.1004158.s007]

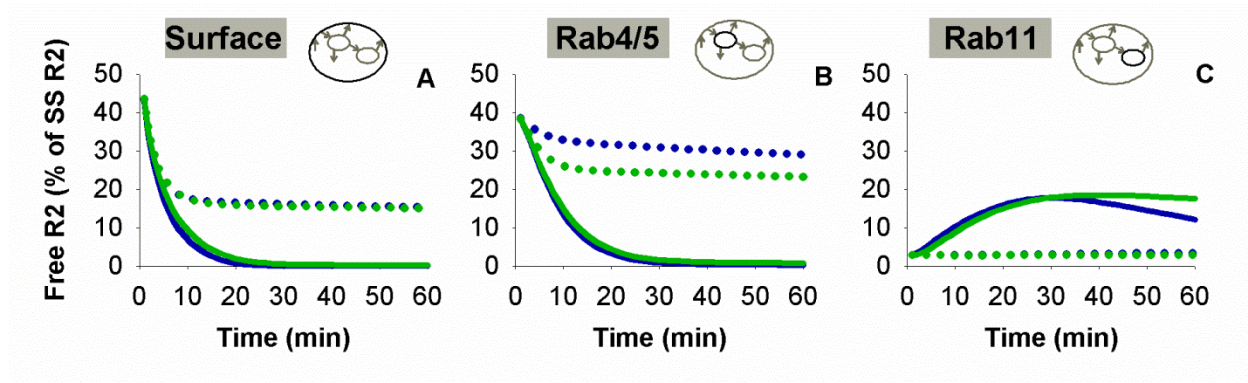

**Figure S7. Loss of NRP1 increases levels of free VEGFR2 on the cell surface and in Rab4/5 endosomes.** These panels expand on the results shown in Figure 7 of the main manuscript. Distribution of unligated VEGFR2. Solid lines: Baseline case with NRP1 present; dotted lines: no NRP1 present. Soluble VEGF (Vs), blue lines; bound VEGF (Vb), green lines. For all lines,  $[V] = 20 \text{ ng/mL}$ , HUVEC receptor numbers.
